# Supplementary material
Source: MDPI journal article supplement (https://www.mdpi.com/1999-4907/15/1/7)
Supplement: s1 [file s1]

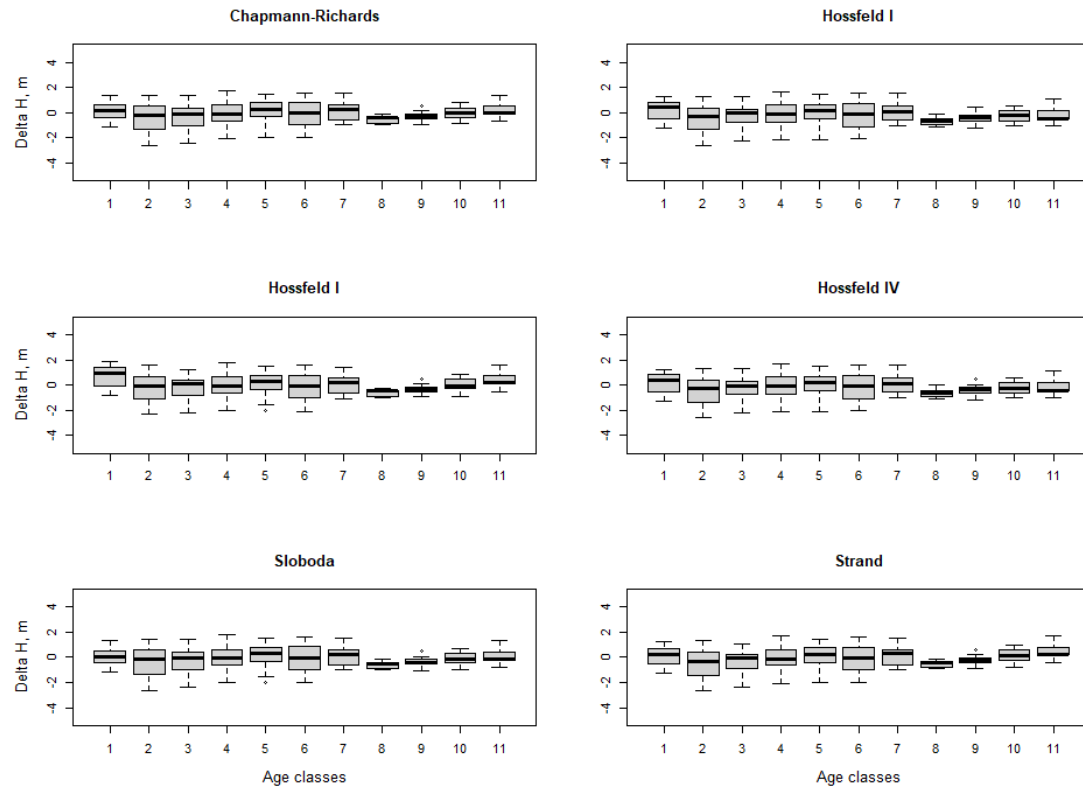

**Figure S1.** The residuals of the calibration height growth models of small-leaved lime according to age classes. Age classes are divided by 10 years. H – tree height.

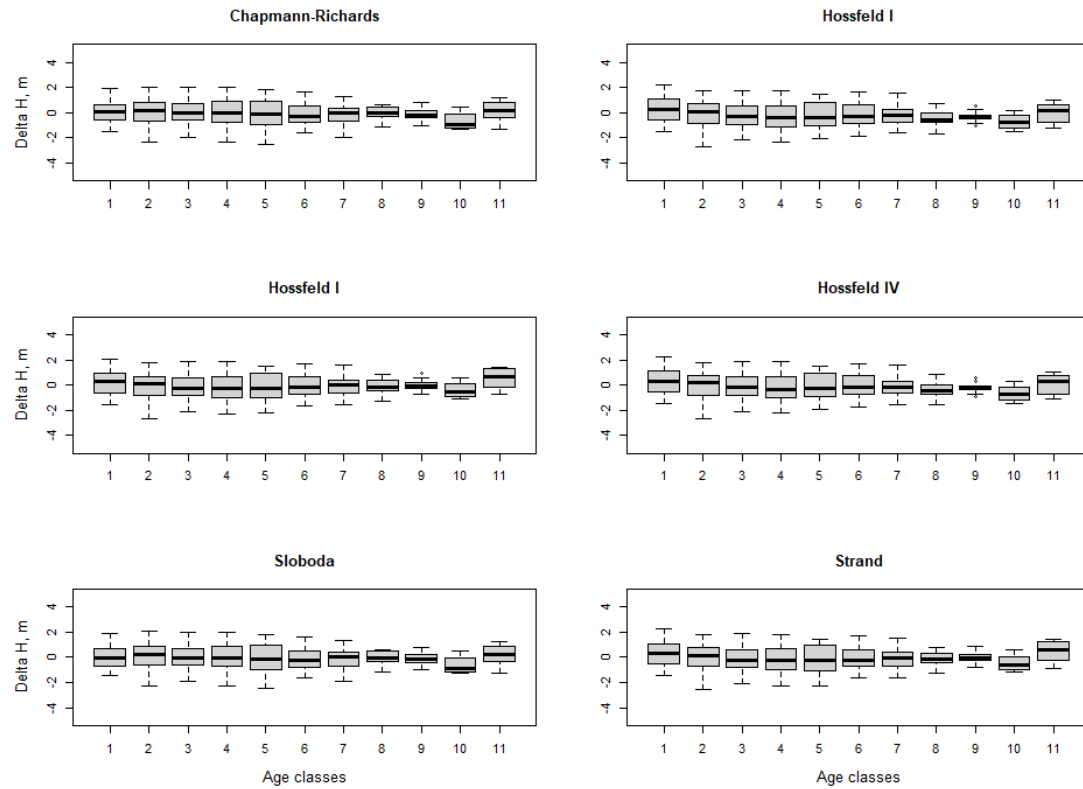

Figure S2. The residuals of the calibration height growth models of Norway maple according to age classes. Age classes are divided by 10 years. H – tree height.
